# Supplementary material for: Live-cell single-molecule dynamics of PcG proteins imposed by the DIPG H3.3K27M mutation
Source: PubMed Central journal article supplement (PMC5970213; doi:10.1038/s41467-018-04455-7), 2018-05-25
Supplement: 41467_2018_4455_MOESM2_ESM.pdf [file 41467_2018_4455_MOESM2_ESM.pdf]

## **Descriptions of Additional Supplementary Files**

File Name: Supplementary Movie 1

Description: H2A-HaloTag in wild-type mES cells during 30-ms exposure time.

File Name: Supplementary Movie 2

Description: HaloTag-NLS in wild-type mES cells during 30-ms exposure time.

File Name: Supplementary Movie 3

Description: HaloTag-Cbx7 in wild-type mES cells during 30-ms exposure time.

File Name: Supplementary Movie 4

Description: HaloTag-Ezh2 in wild-type mES cells during 30-ms exposure time.

File Name: Supplementary Movie 5

Description: HaloTag-Eed in wild-type mES cells during 30-ms exposure time.
